# Supplementary material for: The tumor marker Fascin is induced by the Epstein-Barr virus-encoded oncoprotein LMP1 via NF-κB in lymphocytes and contributes to their invasive migration
Source: PubMed Central journal article supplement (PMC4222691; doi:10.1186/s12964-014-0046-x), 2014-07-11

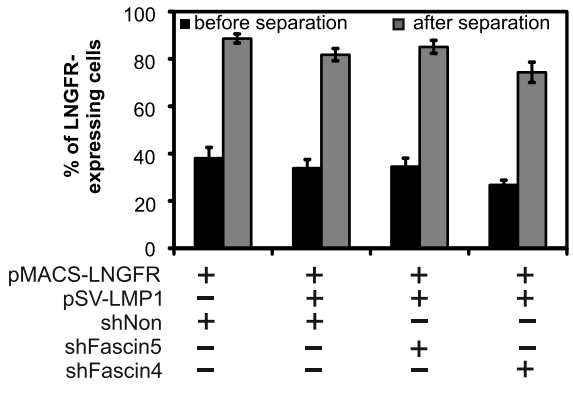

Supplement: s12964-014-0046-x-S3.pdf [file s12964-014-0046-x-S3.pdf]
